# Supplementary material for: The pretreatment of softwood chips and pellets by alkali sulfonation and thermomechanical pulping and its influence on lignin redistribution and the enzyme mediated hydrolysis of the cellulose component
Source: Royal Society of Chemistry journal article supplement (doi:10.1039/d2se00798c), 2022-01-01
Supplement: d2se00798c1.pdf [file d2se00798c1.pdf]

## Supporting Information for

### **The pretreatment of softwood chips and pellets by alkali sulfonation and thermomechanical pulping and its influence on lignin redistribution and the enzyme mediated hydrolysis of the cellulose component**

Masatsugu Takada<sup>1,2\*</sup>, Wu Jie<sup>2</sup>, Pablo Del Rio<sup>2,3</sup>, Haruo Kawamoto<sup>4</sup>, Jack Saddler<sup>2</sup>

1 Graduate School of Bio-Applications and Systems Engineering (BASE), Tokyo

University of Agriculture and Technology, 2-24-16, Nakacho Koganeishi, Tokyo 184-8588, Japan

2 Forest Product Biotechnology/Bioenergy Group, Department of Wood Science,

Faculty of Forestry, University of British Columbia, 2424 Main Mall, Vancouver, BC V6T 1Z4, Canada

3 Department of Chemical Engineering, Faculty of Science, University of Vigo, As

Lagoas, 32004 Ourense, Spain

4 Graduate School of Energy Science, Kyoto University, Yoshida-Honmachi, Kyoto

606-8501, Japan

\* Corresponding authors: [takada-masatsugu@go.tuat.ac.jp](mailto:takada-masatsugu@go.tuat.ac.jp)

Table S1 Elemental analysis of alkaline sulfonated and steam (ST) and hot water

(LHW) pretreated softwood chips and pellets

| Sample |     | Elemental composition (%) |      |       |      |      |
|--------|-----|---------------------------|------|-------|------|------|
|        |     | C                         | H    | O     | N    | S    |
| Chips  | ST  | 46.39                     | 6.08 | 44.28 | 0.00 | 0.30 |
|        | LHW | 47.07                     | 6.07 | 44.23 | 0.10 | 0.19 |
| Pellet | ST  | 46.51                     | 6.15 | 44.58 | 0.05 | 0.12 |
|        | LHW | 46.15                     | 6.19 | 45.41 | 0.00 | 0.30 |

Table S2 Internal linkages of EMAL obtained from softwood chips and pellets, detected

by 2D-HSQC NMR.

| Sample | Interlinkages            |            |                   |
|--------|--------------------------|------------|-------------------|
|        | (per 100 aromatic rings) |            |                   |
|        | $\beta$ -O-4             | $\beta$ -5 | $\beta$ - $\beta$ |
| Chips  |                          |            |                   |
| EMAL   | 39.5                     | 3.2        | 0.0               |
| Pellet |                          |            |                   |
| EMAL   | 34.0                     | 2.8        | 0.9               |
